# Supplementary material
Source: PubMed Central journal article supplement (PMC5436952)
Supplement: NIHMS821176-supplement-1.pdf [file NIHMS821176-supplement-1.pdf]

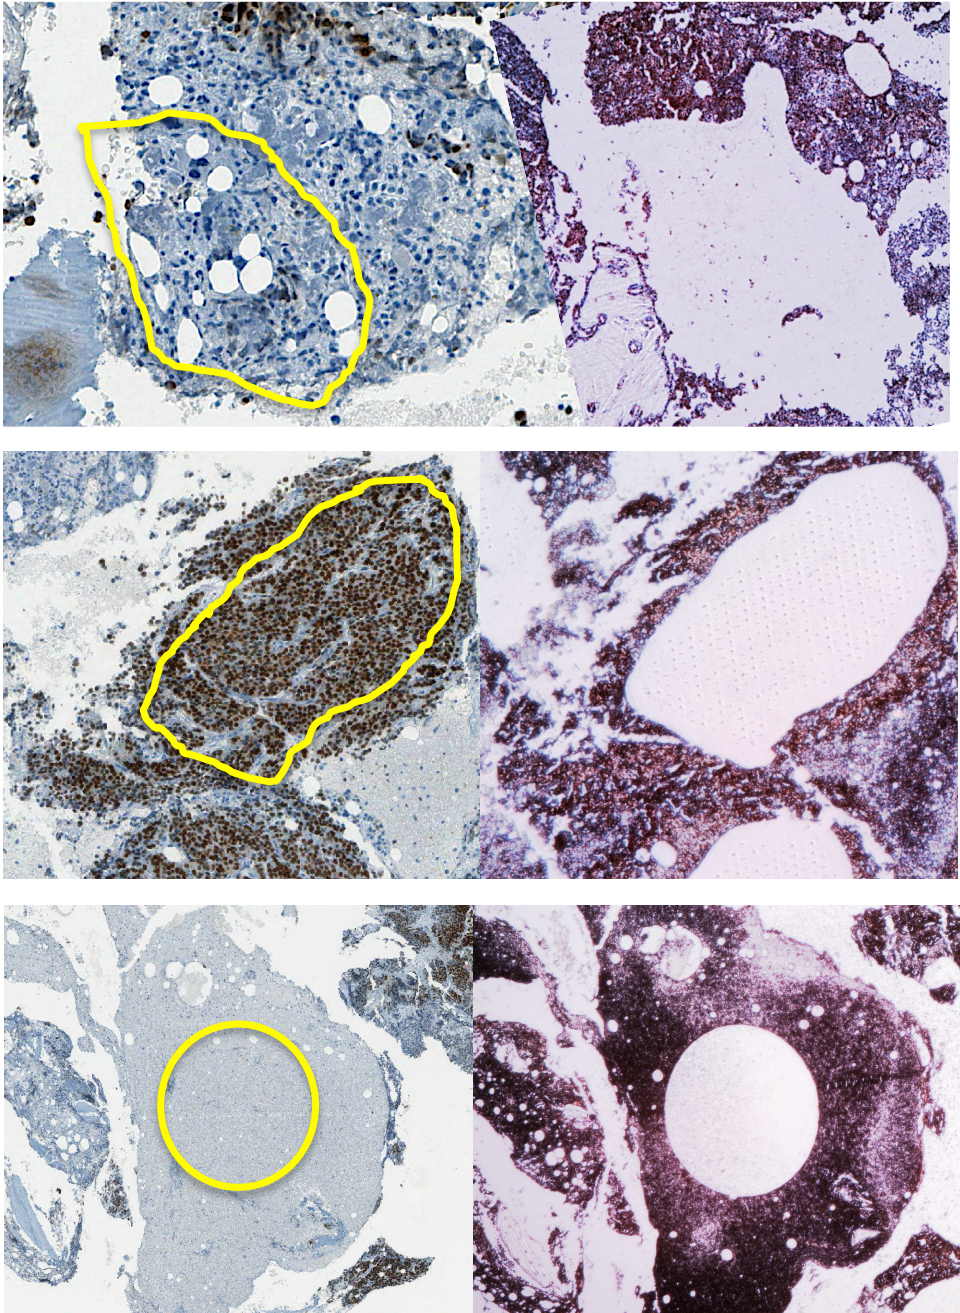

**Supplemental Figure 1.** Tissue samples of human bone metastases were harvested by LCM from areas of tumors negative (top) or positive (middle) for AR as well as normal stromal tissue (bottom). Areas positive for AR show interconnected meshwork of stroma and non cancerous cells displaying a negative staining.

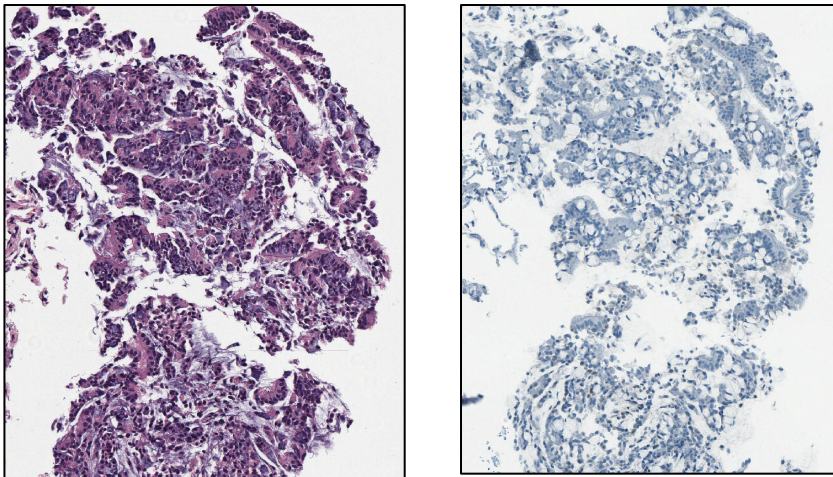

**Supplemental Figure 2.** Specimen from a lung metastasis biopsy in a patient with advanced prostate adenocarcinoma, stained with Hematoxylin-Eosin (left) and for AR (right). The entire tumor tissue appears to lack AR expression, as is commonly observed in visceral metastases in this type of patients.

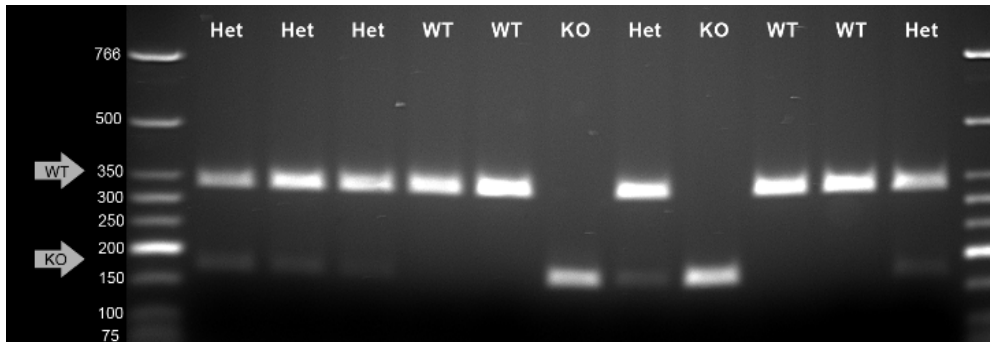

**Supplemental Figure 3.** Representative gel image of IL-1R mouse genotyping by polymerase chain reaction. Multiplex PCR was performed as described in methods; product was then subjected to electrophoresis on a 2% Agarose-TBE gel, stained with ethidium bromide, and imaged with 302 nm transillumination. Wild-Type (WT) allele produces a 350 base pair (bp) product, while the knockout (KO) allele results in a 172 bp amplicon. Presence of both alleles in a single individual indicates heterozygous (Het) genotype.

| <b>SAMPLE</b>          | <b>SYNAPTOPHYSIN</b> | <b>CHROMOGRANIN A</b> |
|------------------------|----------------------|-----------------------|
| MOUSE NEURONAL CULTURE | POSITIVE             | POSITIVE              |
| BONE MET #1 [AR +]     | NEGATIVE             | NEGATIVE              |
| BONE MET #2 [AR+]      | NEGATIVE             | NEGATIVE              |
| BONE MET #1 [AR -]     | NEGATIVE             | NEGATIVE              |
| BONE MET #1 [AR -]     | NEGATIVE             | NEGATIVE              |
| LUNG [AR -]            | POSITIVE             | POSITIVE              |

**Supplemental Table 1.** Results of qRT-PCR for neuroendocrine markers synaptophysin and chromogranin A in human tissues isolated by LCM, indicating that none of the bone metastases surveyed exhibit a neuroendocrine phenotype, while the visceral metastasis proved positive for both markers; cultured mouse neurons were included as a positive control.



| Species | Protein               | Gene Symbol    | TaqMan Assay ID |
|---------|-----------------------|----------------|-----------------|
| Human   | Prostein              | <i>SLC45A3</i> | Hs00263832      |
| Human   | Androgen Receptor     | <i>AR</i>      | Hs04272737      |
| Human   | Interleukin-1 $\beta$ | <i>IL1B</i>    | Hs01555410_m1   |
| Human   | PDGFR $\alpha$        | <i>PDGFRA</i>  | Hs00998028_m1   |
| Human   | GAPDH                 | <i>GAPDH</i>   | Hs99999905_m1   |
| Human   | Synaptophysin         | <i>SYP</i>     | Hs00300531_m1   |
| Human   | Chromogranin A        | <i>CHGA</i>    | Hs00900370_m1   |
| Mouse   | GAPDH                 | <i>Gapdh</i>   | Mm99999915_g1   |
| Mouse   | S100A4                | <i>s100a4</i>  | Mm00803371_m1   |
| Mouse   | COX-2                 | <i>Ptgs2</i>   | Mm00478374_m1   |

**Supplemental Table 2.** Primer-probe sets used for qRT-PCR analysis in the present study.
